# Supplementary material
Source: publisher site journal article supplement (https://www.spandidos-publications.com/840/downloadSupplementary)

Figure S1. Expression of FoxO1 and CCAT1 in the T790M-mutated H1975 NSCLC cell line and wild-type PC-9 NSCLC cell line. \*P<0.05 vs. the PC-9 cells. NSCLC, non-small cell lung carcinoma; FoxO1, forkhead box protein O1; CCAT1, colon cancer associated transcript1.

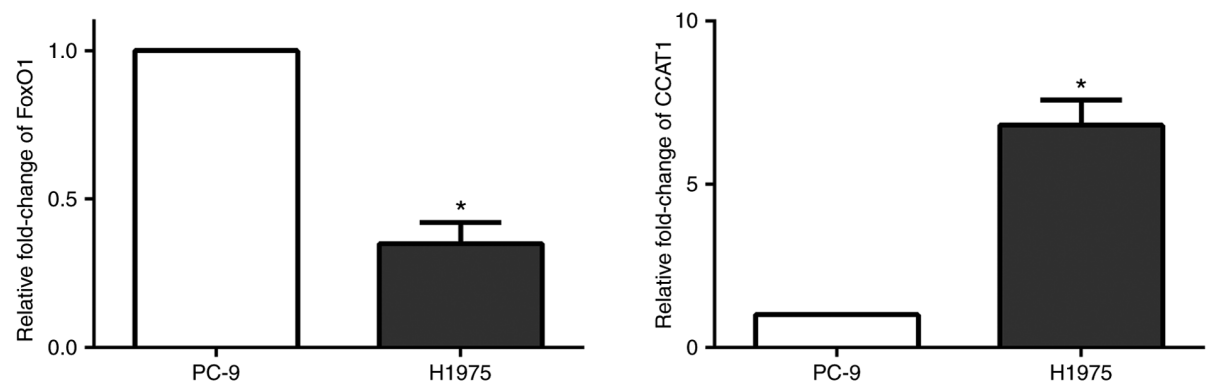

Supplement: Supplementary file 1 [file downloadSupplementary]
